# Supplementary material for: Well-constructed approach of exceptionally water-stable (mesoporous SiO2)-on-(microporous Cu-BTC) composite for efficient methylene blue capture
Source: Royal Society of Chemistry journal article supplement (doi:10.1039/d2nj01993k), 2022-01-01
Supplement: d2nj01993k2.pdf [file d2nj01993k2.pdf]

*Supporting information for*

**Well-construction approach of exceptional water stable  
(mesoporous SiO<sub>2</sub>)-on-(microporous Cu-BTC) composite  
for methylene blue efficient capture**

Haotian Dong,<sup>a</sup> Jiehong Chen,<sup>a</sup> Danping Wu,<sup>b</sup> Kunpeng Xue,<sup>c</sup> Na Ma,<sup>a</sup> and Wei Dai<sup>\*a,b</sup>

<sup>a</sup>College of Geography and Environmental Sciences, Zhejiang Normal University, Jinhua 321004,  
People's Republic of China

<sup>b</sup>Key Laboratory of the Ministry of Education for Advanced Catalysis Materials, College of  
Chemistry and Life Science, Zhejiang Normal University, Jinhua 321004, People's Republic of  
China

<sup>c</sup>Welch Materials (Zhejiang), Inc., Jinhua 321000, China

Corresponding author: Wei Dai

E-mail address: daiwei@zjnu.edu.cn

**Corresponding Author**

Prof. Wei Dai

\*E-mail: daiwei@zjnu.edu.cn. Phone: +86-579-82282269. Fax: +86-579-82282325.

**Section I**

**Chemicals.** Reagents required include ethanol (CH<sub>3</sub>CH<sub>2</sub>OH, ≥ 99.7%), Polyvinylpyrrolidone (PVP), 1,3,5-Benzenetricarboxylic acid (H<sub>3</sub>BTC, 98%), N,N-Dimethylformamide(DMF, ≥99.5%), Methylene blue (MB), which were supplied by Sinopharm Chemical Regent Co., Ltd. Copper nitrate hydrate (Cu(NO<sub>3</sub>)<sub>2</sub>·3H<sub>2</sub>O,

99%), which was supplied by Shanghai Aladdin Biochemical Technology Co., Ltd. Nano SiO<sub>2</sub>. All chemicals selected for this work are not purified in any way.

**Instruments.** The N<sub>2</sub> adsorption isotherms at -196°C were calculated using the physical adsorption device (ASAP 2020), and the total surface area and pore size of the prepared MOFs and composites were calculated. Isotherms were measured using samples heated for 6 hours in a vacuum at 120°C. SEM images were obtained by electron microscope (SEM, Gemini 300). XRD (D2 Phaser, Bruker, Cu K $\alpha$  radiation) was used to analyze the crystal phase of the samples. FT-IR data of potassium bromide particles were recorded by Nicolet Nexus 470 spectrometer. XPS analysis was performed using the Physical Electronics PHI 5700 spectrometer with nonmonochromatic Mg K $\alpha$  radiation (300 W, 15 kV, 1253.6eV) for the core level signals of Cu2p and Si2p were analyzed using a multichannel detector. The spectra of the powder samples were recorded at 29.35 eV by using a 720-um diameter analysis region. THE PHI has access to ESCA-V6. F software package was used for acquisition and data analysis. The Shirley-type background is subtracted from the signal. In order to determine more accurately the binding energies of the core energy levels of different elements, the recorded spectra are always fitted with gaussian Lorentz curves. The estimated error of BE is about 0.1 eV. Thermogravimetric analysis (TG-DSC) is performed on a NETZSCH STA-449C thermal analyzer in the atmosphere of nitrogen.

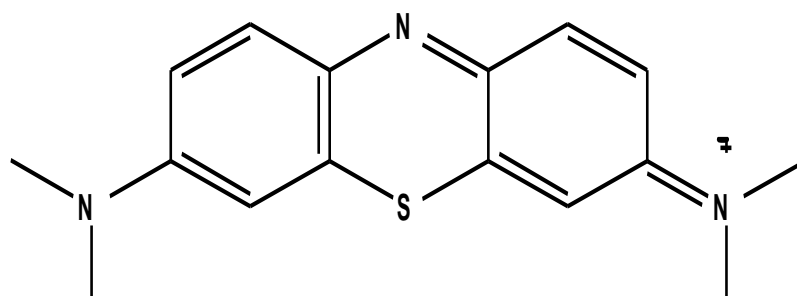

**Scheme S1** Structure of methylene blue.

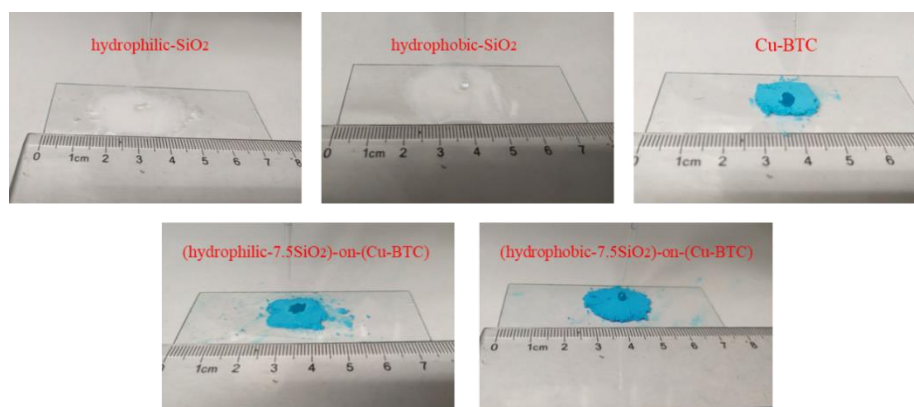

**Scheme S2** Comparisons of hydrophilic and hydrophobic properties of hydrophilic-SiO<sub>2</sub>, hydrophobic-SiO<sub>2</sub>, Cu-BTC, (hydrophilic-7.5SiO<sub>2</sub>)-on-(Cu-BTC), and (hydrophobic-7.5SiO<sub>2</sub>)-on-(Cu-BTC) samples, respectively.

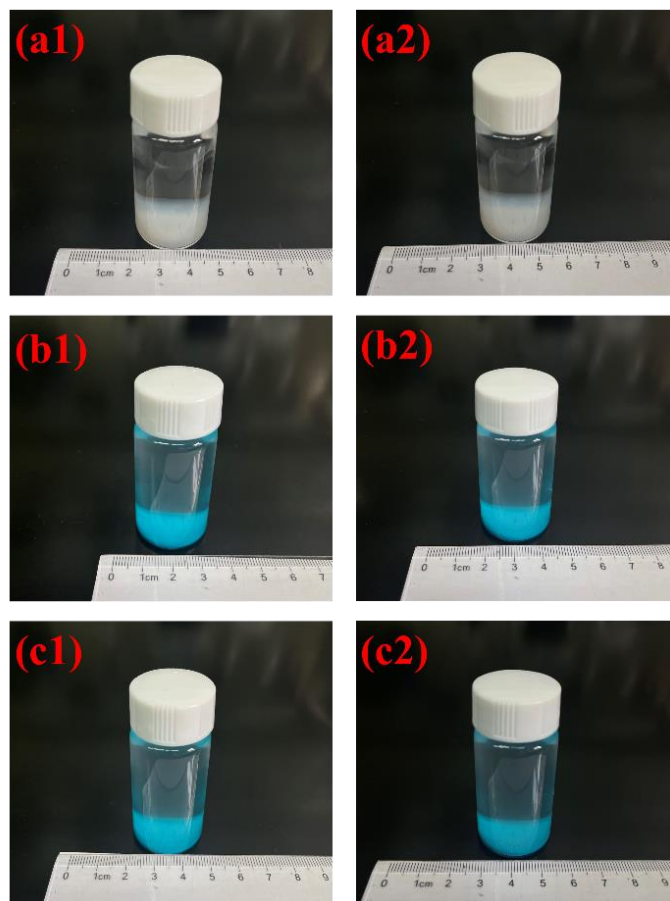

**Scheme S3** Particles morphologies comparisons of as-prepared samples before (1) and after (2) being soaked in strong alkali (pH=12) aqueous solution for 24 h at room temperature (25 °C). (a): Cu-BTC; (b): (hydrophilic-7.5SiO<sub>2</sub>)-on-(Cu-BTC); (c): (hydrophobic-7.5SiO<sub>2</sub>)-on-(Cu-BTC).

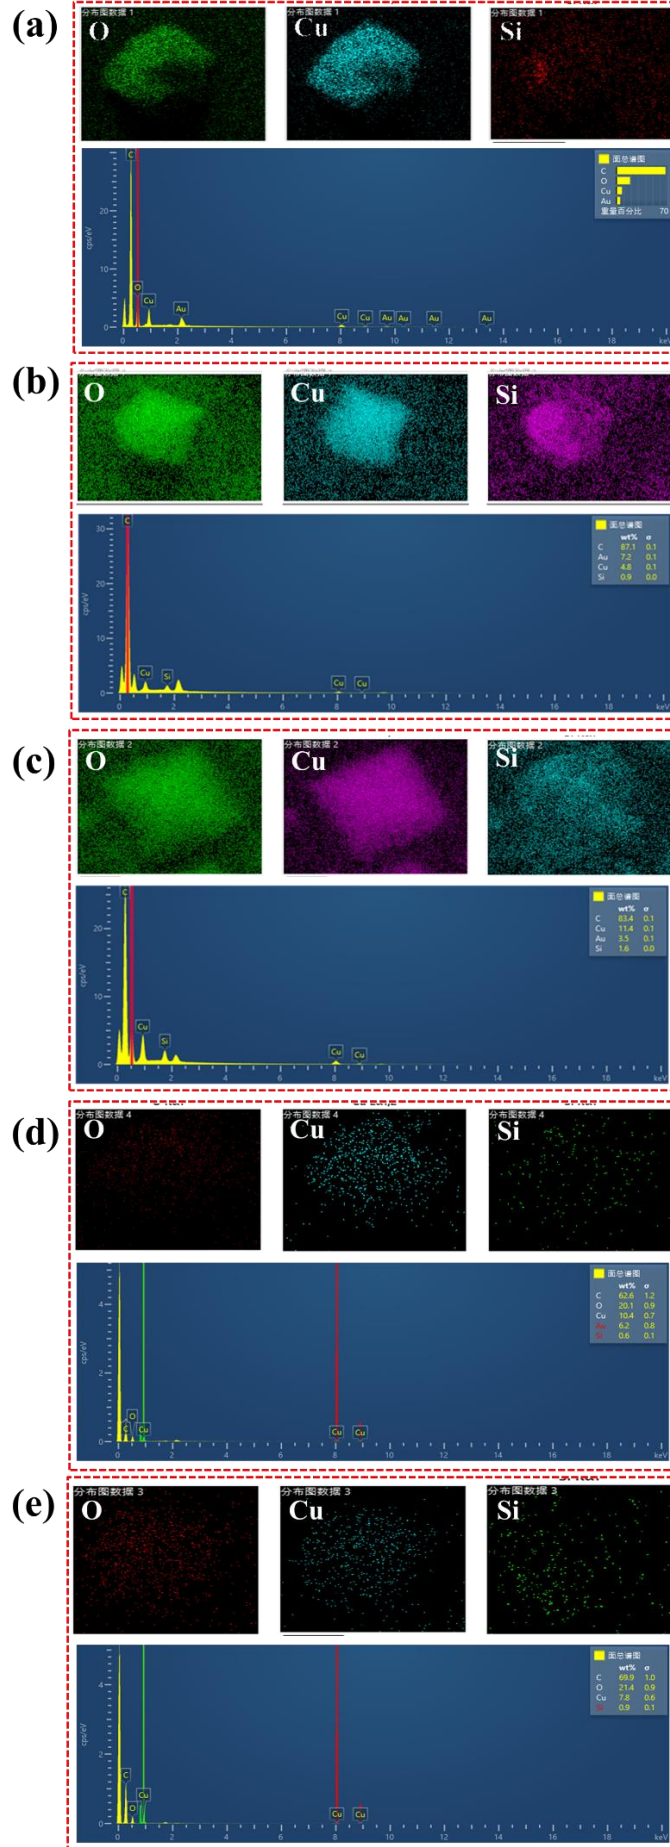

**Fig. S1** EDX images of Cu-BTC (a), (hydrophilic-7.5SiO<sub>2</sub>)-on-(Cu-BTC) (b), (hydrophobic-7.5SiO<sub>2</sub>)-on-(Cu-BTC) (c), and EDX images of (hydrophilic-7.5SiO<sub>2</sub>)-on-(Cu-BTC) (d), (hydrophobic-7.5SiO<sub>2</sub>)-on-(Cu-BTC) (e) after soaking in alkaline solution for 24 h at room temperature (25°C).

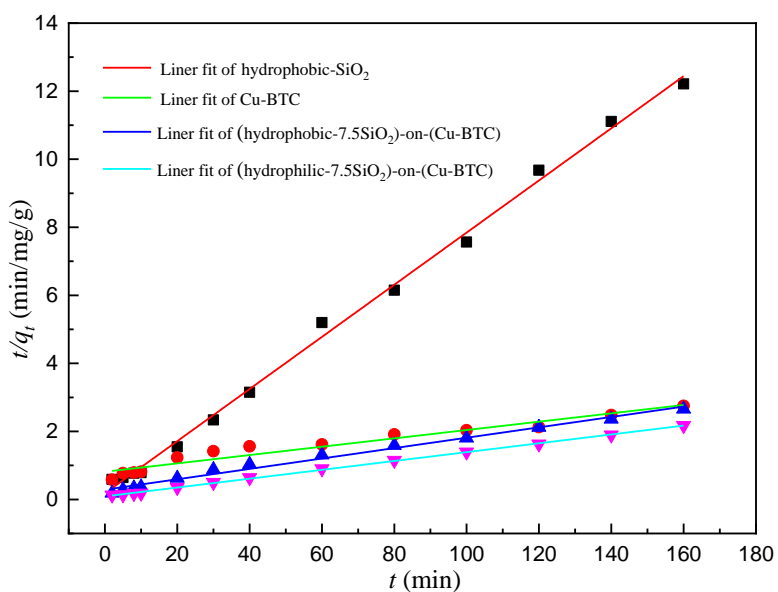

**Fig. S2** Pseudo second-order fitting plots for MB adsorption onto hydrophilic-SiO<sub>2</sub>, Cu-BTC, (hydrophilic-7.5SiO<sub>2</sub>)-on-(Cu-BTC), and (hydrophobic-7.5SiO<sub>2</sub>)-on-(Cu-BTC) samples.

**Table S1** All the chemicals used in this study

| Chemicals                                                                     | Purity | Manufactory                                      |
|-------------------------------------------------------------------------------|--------|--------------------------------------------------|
| CH <sub>3</sub> CH <sub>2</sub> OH                                            | ≥99.7% | Sinopharm Chemical Regent Co., Ltd               |
| Polyvinylpyrrolidone (PVP)                                                    | 187.07 | Sinopharm Chemical Regent Co., Ltd               |
| 1,3,5-Benzenetricarboxylic acid (H <sub>3</sub> BTC)                          | 98%    | Sinopharm Chemical Regent Co., Ltd               |
| N,N-Dimethylformamide(DMF)                                                    | ≥95.5% | Sinopharm Chemical Regent Co., Ltd               |
| Methylene blue (MB)                                                           | ≥82%   | Sinopharm Chemical Regent Co., Ltd               |
| Copper nitrate hydrate (Cu(NO <sub>3</sub> ) <sub>2</sub> ·3H <sub>2</sub> O) | 99%    | Shanghai Aladdin Biochemical Technology Co., Ltd |
| Nano SiO <sub>2</sub>                                                         | ≥99%   | Yuxu Technology Co., Ltd                         |

**Table S2** Textural properties of different materials, respectively.

| Sample                                    | S <sub>BET</sub> (m <sup>2</sup> /g) | V <sub>total</sub> (cm <sup>3</sup> /g) | Average pore diameter (nm) |
|-------------------------------------------|--------------------------------------|-----------------------------------------|----------------------------|
| SiO <sub>2</sub> -hydrophilic             | 211.47                               | 0.854                                   | 9.572                      |
| SiO <sub>2</sub> -hydrophobic             | 187.07                               | 0.784                                   | 7.343                      |
| Cu-BTC@(7.5)SiO <sub>2</sub> -hydrophilic | 645.62                               | 0.455                                   | 2.823                      |
| Cu-BTC@(7.5)SiO <sub>2</sub> -hydrophobic | 605.65                               | 0.440                                   | 2.905                      |
| Cu-BTC                                    | 1356.45                              | 0.581                                   | 1.712                      |
| Cu-BTC@(15)SiO <sub>2</sub> -hydrophilic  | 897.79                               | 0.458                                   | 2.039                      |
| Cu-BTC@(5)SiO <sub>2</sub> -hydrophilic   | 546.40                               | 0.412                                   | 3.014                      |

**Table S3** Adsorption isotherm models used in this study and their linear forms

| Isotherm   | Nonlinear form                          | Linear form                                                                        | Plot                             |
|------------|-----------------------------------------|------------------------------------------------------------------------------------|----------------------------------|
| Langmuir-I | $q_e = \frac{q_L K_L C_e}{1 + K_L C_e}$ | $\frac{C_e}{q_e} = \frac{1}{q_L \cdot K_L} + \left(\frac{1}{q_L}\right) \cdot C_e$ | $\frac{C_e}{q_e}$ versus $C_e$   |
| Freundlich | $q_e = K_f C_e^{\frac{1}{n}}$           | $\ln q_e = \ln K_f + \left(\frac{1}{n}\right) \cdot \ln C_e$                       | $\ln q_e$ versus $\ln C_e$       |
| D-R        | $q_e = q_s e^{(-K_D \varepsilon^2)}$    | $\ln q_e = \ln q_s - K_D \varepsilon^2$                                            | $\ln q_e$ versus $\varepsilon^2$ |

Where  $q_e$  is the maximum capacity of adsorption in mg/g;  $K_L$  is a constant related to the affinity of the binding sites in L/mg; ' $K_f$ ' and 'n' are the measures of adsorption capacity and intensity of adsorption;  $q_s$  is the D-R isotherm constant in mg/g;  $K_D$  stands for the constant that is relevant with the adsorption energy in mol<sup>2</sup>/kJ<sup>2</sup>;  $\varepsilon$  represents the Polanyi potential constant in kJ/mol;



**Table S4** Adsorption isothermal model fitting parameters of hydrophilic-SiO<sub>2</sub>, Cu-BTC, (hydrophobic-7.5SiO<sub>2</sub>)-on-(Cu-BTC) and (hydrophilic-7.5SiO<sub>2</sub>)-on-(Cu-BTC).

| Samples                                        | Langmuir Model  |                 |        | Freundlich Model |      |        | D-R Model       |                                               |        |
|------------------------------------------------|-----------------|-----------------|--------|------------------|------|--------|-----------------|-----------------------------------------------|--------|
|                                                | $q_L$<br>(mg/g) | $K_L$<br>(L/mg) | $R^2$  | $K_f$<br>(L/g)   | $n$  | $R^2$  | $q_s$<br>(mg/g) | $K_D$<br>(mol <sup>2</sup> /kJ <sup>2</sup> ) | $R^2$  |
| (hydrophilic-7.5SiO <sub>2</sub> )-on-(Cu-BTC) | 76.19           | 0.3917          | 0.9958 | 26.8923          | 3.35 | 0.6705 | 72.85           | 0.9099                                        | 0.9088 |
| (hydrophobic-7.5SiO <sub>2</sub> )-on-(Cu-BTC) | 64.89           | 0.2774          | 0.9933 | 17.2415          | 2.72 | 0.7532 | 57.74           | 1.1331                                        | 0.9163 |
| Cu-BTC                                         | 67.38           | 0.1358          | 0.9942 | 9.7817           | 1.96 | 0.8895 | 47.57           | 1.0008                                        | 0.8895 |
| hydrophilic-SiO <sub>2</sub>                   | 13.81           | 0.4639          | 0.9985 | 5.7432           | 4.25 | 0.9335 | 12.38           | 0.4711                                        | 0.8567 |

**Table S5** Kinetic parameters of MB adsorbed onto SiO<sub>2</sub>-hydrophilic, Cu-BTC, Cu-BTC@(7.5)SiO<sub>2</sub>-hydrophobic and Cu-BTC@(7.5)SiO<sub>2</sub>-hydrophilic.

| Samples                                   | Pseudo-first-order rate equation |             |         |        |            |            | Pseudo-second-order rate equation |             |                                          |        |            |            | Intra-particle diffusion model |                                            |        |
|-------------------------------------------|----------------------------------|-------------|---------|--------|------------|------------|-----------------------------------|-------------|------------------------------------------|--------|------------|------------|--------------------------------|--------------------------------------------|--------|
|                                           | $q_{e,exp}$                      | $q_{e,cal}$ | $K_1$   | $R^2$  | $\Delta q$ | $\Delta q$ | $q_{e,exp}$                       | $q_{e,cal}$ | $K_2$                                    | $R^2$  | $\Delta q$ | $\Delta q$ | $C$                            | $K_3$                                      | $R^2$  |
|                                           | (mg/g)                           | (mg/g)      | (L/min) |        | (mg/g)     | (%)        | (mg/g)                            | (mg/g)      | (g·mg <sup>-1</sup> ·min <sup>-1</sup> ) |        | (mg/g)     | (%)        | (mg/g)                         | (mg·g <sup>-1</sup> ·min <sup>-1/2</sup> ) |        |
| SiO <sub>2</sub> -hydrophilic             | 13.22                            | 12.81       | 0.0138  | 0.3156 | 0.41       | 3.10       | 13.22                             | 13.51       | 0.0326                                   | 0.9968 | -0.29      | -2.19      | 8.31                           | 0.4610                                     | 0.3901 |
| Cu-BTC                                    | 56.44                            | 66.56       | 0.0383  | 0.9158 | -10.12     | -17.93     | 56.44                             | 95.19       | 1.84E-04                                 | 0.9472 | -38.75     | -68.65     | -5.30                          | 5.2629                                     | 0.9889 |
| Cu-BTC@(7.5)SiO <sub>2</sub> -hydrophobic | 60.24                            | 55.18       | 0.0242  | 0.9571 | 5.06       | 8.39       | 60.24                             | 63.34       | 8.09E-04                                 | 0.9887 | -5.14      | -8.53      | 10.44                          | 4.2623                                     | 0.9691 |
| Cu-BTC@(7.5)SiO <sub>2</sub> -hydrophilic | 73.94                            | 68.90       | 0.0324  | 0.9229 | 5.04       | 6.82       | 73.94                             | 75.09       | 1.86E-03                                 | 0.9991 | -1.15      | -1.56      | 31.76                          | 3.9448                                     | 0.7665 |

**Table S6** Diffusion coefficients of MB adsorbed onto SiO<sub>2</sub>-hydrophilic ,Cu-BTC, Cu-BTC@(7.5)SiO<sub>2</sub>-hydrophobic and Cu-BTC@(7.5)SiO<sub>2</sub>-hydrophilic.

| <i>Samples</i>                            | <i>K (s<sup>-1</sup>)</i> | <i>D<sub>iq</sub> (cm<sup>2</sup>/s)</i> |
|-------------------------------------------|---------------------------|------------------------------------------|
| SiO <sub>2</sub> -hydrophilic             | 0.1508                    | 1.4004E-08                               |
| Cu-BTC                                    | 0.0135                    | 4.0090E-11                               |
| Cu-BTC@(7.5)SiO <sub>2</sub> -hydrophobic | 0.0202                    | 1.6327E-10                               |
| Cu-BTC@(7.5)SiO <sub>2</sub> -hydrophilic | 0.0253                    | 2.1675E-10                               |

**Table S7** Mass comparisons of as-prepared samples before and after immersion in alkaline solution for 24 h at room temperature (25°C).

| Samples                                   | Initial mass (g) | Final mass (g) | Loss rate (%) |
|-------------------------------------------|------------------|----------------|---------------|
| SiO <sub>2</sub> -hydrophilic             | 0.1000           | 0.0917         | 8             |
| Cu-BTC@(7.5)SiO <sub>2</sub> -hydrophilic | 0.2000           | 0.1820         | 9             |
| Cu-BTC@(7.5)SiO <sub>2</sub> -hydrophobic | 0.2000           | 0.1915         | 4             |

**Table S8** Comparisons of Si contents derived from EDS before and after immersion in alkaline solution for 24 h at room temperature (25°C).

| Samples                                   | Element | Initial (wt%) | Present (wt%) |
|-------------------------------------------|---------|---------------|---------------|
| Cu-BTC@(7.5)SiO <sub>2</sub> -hydrophilic | Si      | 0.9           | 0.6           |
| Cu-BTC@(7.5)SiO <sub>2</sub> -hydrophobic | Si      | 1.6           | 0.9           |

**Table S9** MB uptake capacities of different adsorbents.

| Adsorbents                                     | Uptake capacities (mg/g) | References |
|------------------------------------------------|--------------------------|------------|
| Cu-BTC                                         | 5                        | 1          |
| MIL-101                                        | 21                       | 2          |
| MIL-101                                        | 26                       | 3          |
| MIL-53                                         | 58                       | 4          |
| Zn-MOF                                         | 6                        | 5          |
| MIL-53(Fe)                                     | 25                       | 6          |
| MIL-88B(Fe)                                    | 23                       | 6          |
| Ni-MOF                                         | 18                       | 6          |
| ZIF-67                                         | 17                       | 6          |
| MIL-101(Fe)                                    | 16                       | 6          |
| Chitosan                                       | 27                       | 7          |
| CNT                                            | 46                       | 8          |
| OMWCNT                                         | 47                       | 9          |
| Core shell                                     | 34                       | 10         |
| Cellulose grafted                              | 8                        | 11         |
| Magnetic chitosan/organic rectorite            | 25                       | 12         |
| Cu-BTC                                         | 54                       | This work  |
| (hydrophilic-7.5SiO <sub>2</sub> )-on-(Cu-BTC) | 54                       | This work  |
| (hydrophobic-7.5SiO <sub>2</sub> )-on-(Cu-BTC) | 61                       | This work  |

**References:**

1 S. Lin, Z. L. Song, G. B. Che, A. Ren, P. Li, G. B. Liu, J. S. Zhang, *Micropor. Mesopor. Mat.*, 2014, 193, 27-34.

2 X. X. Huang, L. G. Qiu, W. Zhang, Y. P. Yuan, X. Jiang, A. J. Xie, Y. H. Shen, J. F. Zhu, *CrystEngComm.*, 2012, 14, 1613-1617.

3 T. T. Shen, J. M. Luo, S. Y. Zhang, X. B. Luo, *J. Environ. Chem. Eng.*, 2015, 3, 1372-1383.

4 E. Haque, J. E. Lee, I. T. Jang, Y. K. Hwang, J. S. Chang, J. Jegal, S. H. Jung, *J. Hazard. Mater.*, 2010, 181, 535-542.

- 5 Y. S. Hong, S. L. Sun, Q. Sun, E. Q. Gao, M. Ye, *Mater. Chem. Phys.*, 2020, 243, 122601.
- 6 M. Baziar, H. R. Zakeri, S. Ghaleh askari, Z. D. Nejad, M. Shams, I. Anastopoulos, D. A. Giannakoudakis, E. C. Lima, *J. Mol. Liq.*, 2021, 332, 115832.
- 7 Q. Jin, YD. L, D. S. Yang. J. H. Cui. *RSC Adv.*, 2018, 8, 1255-1264.
- 8 Z. Y. Zhang., X. C. Xu. *Chem. Eng. J.*, 2014, 256, 85-92.
- 9 O. Duman, S. Tunc, T. G. Polat, B. K. I. Bozoglan. *Carbohydr. Polym.*, 2016, 147, 79-88.
- 10 Y. M. Zhou, T. Li, J. L. Shen., Y. Meng, S. H. Tong., Q. F. Guan, X. X. Xia. *Polymers.*, 2021, 13, 3054.
- 11 H. Alijani, M. H. Beyki, R. Kaveh, Y. Fazli, *Polym. Bull.*, 2017, 75, 2167-2180.
- 12 L. Zeng, M. Xie, Q. Zhang, Y. Kang, X. Guo, H. Xiao, Y. Peng, J. Luo, *Carbohydr. Polym.*, 2015, 346, 348-353.
